# Supplementary material for: Gene Expression Profiling in Viable but Nonculturable (VBNC) Cells of Pseudomonas syringae pv. syringae
Source: Front Microbiol. 2015 Dec 18;6:1419. doi: 10.3389/fmicb.2015.01419 (PMC4683178; doi:10.3389/fmicb.2015.01419)
Supplement: Supplementary file 4 [file Table4.XLSX]

## Sheet: KEGG Pathways
Supplementary Table S4. KEGG pathways associated with all DEGs indentified in this work
KEGG pathway map number	KEGG pathways	Number of hits
psb01100	Metabolic pathways	124
psb02010	ABC transporters	61
psb01110	Biosynthesis of secondary metabolites	39
psb02020	Two-component system	38
psb01120	Microbial metabolism in diverse environments	36
psb01130	Biosynthesis of antibiotics	28
psb02030	Bacterial chemotaxis	20
psb01230	Biosynthesis of amino acids	20
psb01200	Carbon metabolism	19
psb00260	Glycine, serine and threonine metabolism	13
psb00630	Glyoxylate and dicarboxylate metabolism	12
psb00190	Oxidative phosphorylation	11
psb00920	Sulfur metabolism	11
psb01210	2-Oxocarboxylic acid metabolism	9
psb00620	Pyruvate metabolism	8
psb00220	Arginine biosynthesis	8
psb00030	Pentose phosphate pathway	7
psb02040	Flagellar assembly	7
psb00550	Peptidoglycan biosynthesis	7
psb00230	Purine metabolism	7
psb00520	Amino sugar and nucleotide sugar metabolism	6
psb00280	Valine, leucine and isoleucine degradation	6
psb03010	Ribosome	6
psb00250	Alanine, aspartate and glutamate metabolism	6
psb03070	Bacterial secretion system	6
psb00290	Valine, leucine and isoleucine biosynthesis	5
psb00240	Pyrimidine metabolism	5
psb00010	Glycolysis / Gluconeogenesis	5
psb00562	Inositol phosphate metabolism	5
psb00790	Folate biosynthesis	5
psb00340	Histidine metabolism	5
psb00670	One carbon pool by folate	5
psb00910	Nitrogen metabolism	5
psb00860	Porphyrin and chlorophyll metabolism	4
psb01212	Fatty acid metabolism	4
psb00450	Selenocompound metabolism	4
psb01503	Cationic antimicrobial peptide (CAMP) resistance	4
psb00460	Cyanoamino acid metabolism	4
psb00051	Fructose and mannose metabolism	4
psb00380	Tryptophan metabolism	4
psb00053	Ascorbate and aldarate metabolism	4
psb00360	Phenylalanine metabolism	4
psb00500	Starch and sucrose metabolism	4
psb00643	Styrene degradation	3
psb00400	Phenylalanine, tyrosine and tryptophan biosynthesis	3
psb00310	Lysine degradation	3
psb00627	Aminobenzoate degradation	3
psb01502	Vancomycin resistance	3
psb00770	Pantothenate and CoA biosynthesis	3
psb00970	Aminoacyl-tRNA biosynthesis	3
psb01501	beta-Lactam resistance	3
psb00061	Fatty acid biosynthesis	3
psb00625	Chloroalkane and chloroalkene degradation	3
psb00362	Benzoate degradation	3
psb00640	Propanoate metabolism	3
psb03440	Homologous recombination	3
psb00650	Butanoate metabolism	3
psb00410	beta-Alanine metabolism	3
psb00330	Arginine and proline metabolism	3
psb01220	Degradation of aromatic compounds	2
psb00130	Ubiquinone and other terpenoid	2
psb00040	Pentose and glucuronate interconversions	2
psb00071	Fatty acid degradation	2
psb03430	Mismatch repair	2
psb00270	Cysteine and methionine metabolism	2
psb00440	Phosphonate and phosphinate metabolism	2
psb00052	Galactose metabolism	2
psb04122	Sulfur relay system	2
psb00561	Glycerolipid metabolism	2
psb00540	Lipopolysaccharide biosynthesis	2
psb00261	Monobactam biosynthesis	2
psb00680	Methane metabolism	2
psb03030	DNA replication	2
psb00760	Nicotinate and nicotinamide metabolism	2
psb00471	D-Glutamine and D-glutamate metabolism	2
psb00730	Thiamine metabolism	2
psb00521	Streptomycin biosynthesis	2
psb03410	Base excision repair	2
psb00564	Glycerophospholipid metabolism	2
psb00020	Citrate cycle (TCA cycle)	2
psb01040	Biosynthesis of unsaturated fatty acids	2
psb00780	Biotin metabolism	2
psb00072	Synthesis and degradation of ketone bodies	1
psb00750	Vitamin B6 metabolism	1
psb00791	Atrazine degradation	1
psb00430	Taurine and hypotaurine metabolism	1
psb00903	Limonene and pinene degradation	1
psb00523	Polyketide sugar unit biosynthesis	1
psb00350	Tyrosine metabolism	1
psb03018	RNA degradation	1
psb00361	Chlorocyclohexane and chlorobenzene degradation	1
psb00900	Terpenoid backbone biosynthesis	1
psb00660	C5-Branched dibasic acid metabolism	1
psb00930	Caprolactam degradation	1
psb00480	Glutathione metabolism	1
psb00281	Geraniol degradation	1
psb00473	D-Alanine metabolism	1
